# Supplementary material
Source: Springer Nature journal article supplement (https://www.springermedizin.de/resource/supplementary/13058_2009_2430_MOESM5_ESM.pdf/9701392)

Average DNA methylation (%)

50  
40  
30  
20  
10  
0

N

*PPP2R2B*

D

*PPP2R2B*

N

*ABCB1*

D

*ABCB1*

N

*FOXC1*

D

*FOXC1*

N

*PTEN*

D

*PTEN*

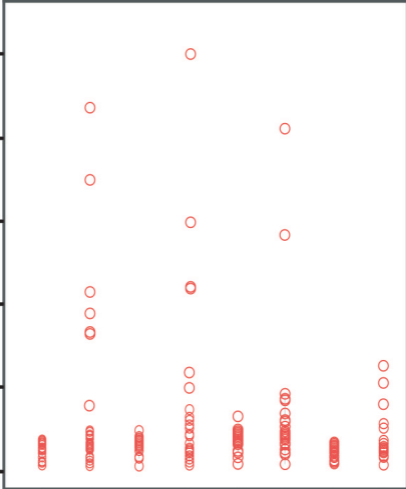

Supplement: MOESM5 [file 9701392]
